# Supplementary material for: Formation of an unusual charge-transfer network from an ionic liquid
Source: Royal Society of Chemistry journal article supplement (doi:10.1039/b513893k), 2005-11-22
Supplement: b513893k.pdf [file b513893k.pdf]

**Supplementary information for**

**Formation of an unusual charge-transfer network from an ionic liquid**

Rico E. Del Sesto, Gary A. Baker, Sheila N. Baker, Brian L. Scott, Timothy S. Keizer,  
Anthony K. Burrell and T. Mark McCleskey\*

## 1. Procedure for crystallization of DMDP:EV(Tf<sub>2</sub>N)<sub>2</sub>.

The ionic liquid N-butyl-N-methylpyrrolidinium bistriflylamide ([C<sub>4</sub>mpy][Tf<sub>2</sub>N]) was synthesized by reacting N-butyl-N-methylpyrrolidinium bromide with one equivalent of lithium bistriflylamide in water. The resulting ionic liquid forms a separate layer, which is extracted with dichloromethane, washed several times with water, and dried under vacuum at 60°C. Equimolar molar amounts of dimethyldihydrophenazine (DMDP) and diethylviologen bistriflylamide (EV[Tf<sub>2</sub>N]<sub>2</sub>) were dissolved in hot (200°C) [C<sub>4</sub>mpy][Tf<sub>2</sub>N], and the solution was allowed to cool to room temperature, yielding green crystalline material. In acetone, the DMDP and EV[Tf<sub>2</sub>N]<sub>2</sub> were dissolved in hot acetone, and the solution was allowed to cool and solvent volume reduced, resulting in green crystals.

## 2. Crystal coordinates for DMDP:EV(Tf<sub>2</sub>N)<sub>2</sub>.

Table 1. Crystal data and structure refinement for DMDP:EV(Tf<sub>2</sub>N)<sub>2</sub>.

|                                   |                                                                                              |                 |
|-----------------------------------|----------------------------------------------------------------------------------------------|-----------------|
| Identification code               | DMDP:EV(Tf <sub>2</sub> N) <sub>2</sub>                                                      |                 |
| Empirical formula                 | C <sub>32</sub> H <sub>32</sub> F <sub>12</sub> N <sub>6</sub> O <sub>8</sub> S <sub>4</sub> |                 |
| Formula weight                    | 984.88                                                                                       |                 |
| Temperature                       | 203(2) K                                                                                     |                 |
| Wavelength                        | 0.71073 Å                                                                                    |                 |
| Crystal system                    | triclinic                                                                                    |                 |
| Space group                       | P -1                                                                                         |                 |
| Unit cell dimensions              | a = 12.490(5) Å                                                                              | α = 71.643(6)°. |
|                                   | b = 12.820(5) Å                                                                              | β = 72.240(7)°. |
|                                   | c = 13.993(6) Å                                                                              | γ = 82.390(8)°. |
| Volume                            | 2023.5(14) Å <sup>3</sup>                                                                    |                 |
| Z                                 | 2                                                                                            |                 |
| Density (calculated)              | 1.616 Mg/m <sup>3</sup>                                                                      |                 |
| Absorption coefficient            | 0.347 mm <sup>-1</sup>                                                                       |                 |
| F(000)                            | 1004                                                                                         |                 |
| Crystal size                      | 0.44 x 0.32 x 0.10 mm <sup>3</sup>                                                           |                 |
| Theta range for data collection   | 1.60 to 25.39°.                                                                              |                 |
| Index ranges                      | -14 ≤ h ≤ 15, -15 ≤ k ≤ 15, -16 ≤ l ≤ 16                                                     |                 |
| Reflections collected             | 12935                                                                                        |                 |
| Independent reflections           | 6768 [R(int) = 0.0200]                                                                       |                 |
| Max. and min. transmission        | 0.9661 and 0.8623                                                                            |                 |
| Refinement method                 | Full-matrix least-squares on F <sup>2</sup>                                                  |                 |
| Data / restraints / parameters    | 6768 / 0 / 559                                                                               |                 |
| Goodness-of-fit on F <sup>2</sup> | 1.650                                                                                        |                 |
| Final R indices [I > 2σ(I)]       | R1 = 0.0607, wR2 = 0.1568                                                                    |                 |
| R indices (all data)              | R1 = 0.0730, wR2 = 0.1609                                                                    |                 |
| Largest diff. peak and hole       | 0.676 and -0.564 e.Å <sup>-3</sup>                                                           |                 |

Table 2. Atomic coordinates ( $\times 10^4$ ) and equivalent isotropic displacement parameters ( $\text{\AA}^2 \times 10^3$ ) for DMDP:EV(Tf<sub>2</sub>N)<sub>2</sub>. U(eq) is defined as one third of the trace of the orthogonalized U<sup>ij</sup> tensor.

|       | x        | y       | z       | U(eq)  |
|-------|----------|---------|---------|--------|
| S(1)  | 7865(1)  | 7840(1) | 2879(1) | 42(1)  |
| S(2)  | 9580(1)  | 6201(1) | 2838(1) | 41(1)  |
| S(3)  | 4935(1)  | 2103(1) | 626(1)  | 43(1)  |
| S(4)  | 4259(1)  | 2718(1) | 2477(1) | 38(1)  |
| F(1)  | 7486(2)  | 7879(2) | 4815(2) | 58(1)  |
| F(2)  | 6006(2)  | 7748(3) | 4386(2) | 82(1)  |
| F(3)  | 7132(2)  | 6346(2) | 4681(2) | 64(1)  |
| F(4)  | 9878(3)  | 6991(3) | 813(2)  | 89(1)  |
| F(5)  | 11271(2) | 7178(3) | 1313(2) | 89(1)  |
| F(6)  | 10941(3) | 5591(3) | 1275(3) | 101(1) |
| F(7)  | 6999(2)  | 1335(2) | 558(2)  | 66(1)  |
| F(8)  | 5745(2)  | 472(2)  | 1915(2) | 64(1)  |
| F(9)  | 5933(2)  | 244(2)  | 411(2)  | 77(1)  |
| F(10) | 2490(2)  | 3509(3) | 1824(2) | 84(1)  |
| F(11) | 3585(3)  | 4736(2) | 1653(2) | 89(1)  |
| F(12) | 2535(2)  | 3930(2) | 3163(2) | 79(1)  |
| O(1)  | 7866(2)  | 9008(2) | 2616(2) | 57(1)  |
| O(2)  | 7311(2)  | 7356(2) | 2386(2) | 59(1)  |
| O(3)  | 8792(2)  | 5455(2) | 2901(2) | 56(1)  |
| O(4)  | 10356(3) | 5809(2) | 3444(2) | 60(1)  |
| O(5)  | 3894(2)  | 1575(3) | 922(2)  | 56(1)  |
| O(6)  | 5402(3)  | 2685(3) | -452(2) | 69(1)  |
| O(7)  | 4857(2)  | 3104(2) | 3011(2) | 53(1)  |
| O(8)  | 3664(2)  | 1730(2) | 3018(2) | 45(1)  |
| N(1)  | 8952(2)  | 2343(2) | 4589(2) | 31(1)  |
| N(2)  | 7221(2)  | 1223(2) | 4611(2) | 34(1)  |
| N(3)  | 9091(3)  | 7381(2) | 2916(2) | 42(1)  |
| N(4)  | 5028(3)  | 2816(2) | 1329(2) | 46(1)  |
| N(5)  | 1105(3)  | 224(3)  | 2311(2) | 45(1)  |
| N(6)  | 6124(2)  | 5162(2) | 2331(2) | 35(1)  |
| C(1)  | 9902(3)  | 2885(3) | 4596(3) | 38(1)  |
| C(2)  | 6361(3)  | 547(3)  | 4631(3) | 43(1)  |
| C(3)  | 8009(3)  | 2146(2) | 5486(2) | 29(1)  |
| C(4)  | 7952(3)  | 2463(3) | 6365(3) | 37(1)  |
| C(5)  | 7059(3)  | 2165(3) | 7270(3) | 43(1)  |
| C(6)  | 6202(3)  | 1588(3) | 7292(3) | 45(1)  |
| C(7)  | 6224(3)  | 1295(3) | 6400(3) | 38(1)  |
| C(8)  | 7123(3)  | 1558(2) | 5500(2) | 31(1)  |
| C(9)  | 7877(3)  | 1844(2) | 3634(3) | 32(1)  |
| C(10) | 7701(3)  | 1887(3) | 2688(3) | 39(1)  |
| C(11) | 8416(3)  | 2462(3) | 1740(3) | 46(1)  |
| C(12) | 9288(3)  | 3021(3) | 1723(3) | 44(1)  |
| C(13) | 9459(3)  | 3011(3) | 2665(3) | 36(1)  |
| C(14) | 8777(3)  | 2425(2) | 3620(2) | 30(1)  |
| C(15) | 5245(3)  | 5038(2) | 4435(2) | 31(1)  |
| C(16) | 6200(3)  | 4437(3) | 4081(3) | 40(1)  |
| C(17) | 6627(3)  | 4508(3) | 3037(3) | 41(1)  |
| C(19) | 5211(3)  | 5772(3) | 2648(3) | 49(1)  |
| C(20) | 4759(3)  | 5722(3) | 3676(3) | 51(1)  |
| C(21) | 6585(3)  | 5186(3) | 1208(3) | 46(1)  |
| C(22) | 7617(4)  | 5837(4) | 698(3)  | 68(1)  |

|       |          |         |         |        |
|-------|----------|---------|---------|--------|
| C(23) | 231(3)   | 61(2)   | 4430(2) | 28(1)  |
| C(24) | -368(3)  | -257(3) | 3876(3) | 35(1)  |
| C(25) | 84(3)    | -171(3) | 2837(3) | 42(1)  |
| C(27) | 1694(3)  | 577(3)  | 2803(3) | 38(1)  |
| C(28) | 1278(3)  | 504(3)  | 3843(2) | 32(1)  |
| C(29) | 1631(4)  | 242(5)  | 1194(3) | 80(2)  |
| C(30) | 1081(8)  | 762(10) | 514(4)  | 257(8) |
| C(31) | 7073(3)  | 7424(3) | 4271(3) | 47(1)  |
| C(32) | 10477(4) | 6512(4) | 1493(3) | 58(1)  |
| C(33) | 5969(3)  | 976(3)  | 895(3)  | 46(1)  |
| C(34) | 3158(4)  | 3787(3) | 2263(3) | 51(1)  |

Table 3. Bond lengths [ $\text{\AA}$ ] and angles [ $^\circ$ ] for DMDP:EV(Tf<sub>2</sub>N)<sub>2</sub>.

|             |          |
|-------------|----------|
| S(1)-O(2)   | 1.420(3) |
| S(1)-O(1)   | 1.426(3) |
| S(1)-N(3)   | 1.576(3) |
| S(1)-C(31)  | 1.835(4) |
| S(2)-O(4)   | 1.421(3) |
| S(2)-O(3)   | 1.426(3) |
| S(2)-N(3)   | 1.578(3) |
| S(2)-C(32)  | 1.821(4) |
| S(3)-O(6)   | 1.429(3) |
| S(3)-O(5)   | 1.431(3) |
| S(3)-N(4)   | 1.576(3) |
| S(3)-C(33)  | 1.832(4) |
| S(4)-O(8)   | 1.425(3) |
| S(4)-O(7)   | 1.427(3) |
| S(4)-N(4)   | 1.576(3) |
| S(4)-C(34)  | 1.830(4) |
| F(1)-C(31)  | 1.335(4) |
| F(2)-C(31)  | 1.319(4) |
| F(3)-C(31)  | 1.321(4) |
| F(4)-C(32)  | 1.336(5) |
| F(5)-C(32)  | 1.309(5) |
| F(6)-C(32)  | 1.326(5) |
| F(7)-C(33)  | 1.319(5) |
| F(8)-C(33)  | 1.326(4) |
| F(9)-C(33)  | 1.330(4) |
| F(10)-C(34) | 1.315(5) |
| F(11)-C(34) | 1.317(5) |
| F(12)-C(34) | 1.317(5) |
| N(1)-C(14)  | 1.407(4) |
| N(1)-C(3)   | 1.416(4) |
| N(1)-C(1)   | 1.455(4) |
| N(2)-C(9)   | 1.406(4) |
| N(2)-C(8)   | 1.406(4) |
| N(2)-C(2)   | 1.455(4) |
| N(5)-C(25)  | 1.337(5) |
| N(5)-C(27)  | 1.346(4) |
| N(5)-C(29)  | 1.494(5) |
| N(6)-C(19)  | 1.334(4) |
| N(6)-C(17)  | 1.338(4) |
| N(6)-C(21)  | 1.491(4) |
| C(3)-C(4)   | 1.392(5) |
| C(3)-C(8)   | 1.412(4) |
| C(4)-C(5)   | 1.393(5) |
| C(5)-C(6)   | 1.367(5) |
| C(6)-C(7)   | 1.404(5) |
| C(7)-C(8)   | 1.389(5) |
| C(9)-C(10)  | 1.391(5) |
| C(9)-C(14)  | 1.421(4) |

|               |          |
|---------------|----------|
| C(10)-C(11)   | 1.392(5) |
| C(11)-C(12)   | 1.372(5) |
| C(12)-C(13)   | 1.394(5) |
| C(13)-C(14)   | 1.385(5) |
| C(15)-C(16)   | 1.378(5) |
| C(15)-C(20)   | 1.389(5) |
| C(15)-C(15)#1 | 1.489(6) |
| C(16)-C(17)   | 1.371(5) |
| C(19)-C(20)   | 1.359(5) |
| C(21)-C(22)   | 1.489(6) |
| C(23)-C(28)   | 1.397(5) |
| C(23)-C(24)   | 1.401(4) |
| C(23)-C(23)#2 | 1.486(6) |
| C(24)-C(25)   | 1.363(5) |
| C(27)-C(28)   | 1.365(5) |
| C(29)-C(30)   | 1.304(8) |

|                  |            |
|------------------|------------|
| O(2)-S(1)-O(1)   | 119.30(17) |
| O(2)-S(1)-N(3)   | 117.06(16) |
| O(1)-S(1)-N(3)   | 107.45(17) |
| O(2)-S(1)-C(31)  | 104.85(18) |
| O(1)-S(1)-C(31)  | 103.68(17) |
| N(3)-S(1)-C(31)  | 102.12(17) |
| O(4)-S(2)-O(3)   | 118.13(17) |
| O(4)-S(2)-N(3)   | 109.83(16) |
| O(3)-S(2)-N(3)   | 116.30(17) |
| O(4)-S(2)-C(32)  | 103.3(2)   |
| O(3)-S(2)-C(32)  | 104.97(19) |
| N(3)-S(2)-C(32)  | 101.84(18) |
| O(6)-S(3)-O(5)   | 118.65(18) |
| O(6)-S(3)-N(4)   | 108.92(19) |
| O(5)-S(3)-N(4)   | 116.24(16) |
| O(6)-S(3)-C(33)  | 103.92(18) |
| O(5)-S(3)-C(33)  | 104.74(19) |
| N(4)-S(3)-C(33)  | 102.09(17) |
| O(8)-S(4)-O(7)   | 118.36(16) |
| O(8)-S(4)-N(4)   | 116.70(15) |
| O(7)-S(4)-N(4)   | 108.46(18) |
| O(8)-S(4)-C(34)  | 104.40(18) |
| O(7)-S(4)-C(34)  | 104.02(18) |
| N(4)-S(4)-C(34)  | 102.74(17) |
| C(14)-N(1)-C(3)  | 117.7(3)   |
| C(14)-N(1)-C(1)  | 118.9(3)   |
| C(3)-N(1)-C(1)   | 118.5(3)   |
| C(9)-N(2)-C(8)   | 118.3(3)   |
| C(9)-N(2)-C(2)   | 118.7(3)   |
| C(8)-N(2)-C(2)   | 119.1(3)   |
| S(1)-N(3)-S(2)   | 124.75(19) |
| S(4)-N(4)-S(3)   | 125.0(2)   |
| C(25)-N(5)-C(27) | 119.8(3)   |
| C(25)-N(5)-C(29) | 121.3(3)   |
| C(27)-N(5)-C(29) | 118.9(3)   |
| C(19)-N(6)-C(17) | 119.3(3)   |
| C(19)-N(6)-C(21) | 121.2(3)   |
| C(17)-N(6)-C(21) | 119.4(3)   |
| C(4)-C(3)-C(8)   | 119.3(3)   |
| C(4)-C(3)-N(1)   | 122.5(3)   |
| C(8)-C(3)-N(1)   | 118.2(3)   |
| C(3)-C(4)-C(5)   | 120.8(3)   |
| C(6)-C(5)-C(4)   | 120.1(3)   |
| C(5)-C(6)-C(7)   | 119.9(3)   |
| C(8)-C(7)-C(6)   | 120.9(3)   |
| C(7)-C(8)-N(2)   | 123.1(3)   |
| C(7)-C(8)-C(3)   | 118.9(3)   |
| N(2)-C(8)-C(3)   | 117.9(3)   |

|                     |          |
|---------------------|----------|
| C(10)-C(9)-N(2)     | 122.9(3) |
| C(10)-C(9)-C(14)    | 119.0(3) |
| N(2)-C(9)-C(14)     | 118.1(3) |
| C(9)-C(10)-C(11)    | 120.6(3) |
| C(12)-C(11)-C(10)   | 120.6(3) |
| C(11)-C(12)-C(13)   | 119.6(3) |
| C(14)-C(13)-C(12)   | 121.1(3) |
| C(13)-C(14)-N(1)    | 123.2(3) |
| C(13)-C(14)-C(9)    | 119.1(3) |
| N(1)-C(14)-C(9)     | 117.7(3) |
| C(16)-C(15)-C(20)   | 116.3(3) |
| C(16)-C(15)-C(15)#1 | 122.1(3) |
| C(20)-C(15)-C(15)#1 | 121.6(4) |
| C(17)-C(16)-C(15)   | 121.1(3) |
| N(6)-C(17)-C(16)    | 120.8(3) |
| N(6)-C(19)-C(20)    | 121.6(3) |
| C(19)-C(20)-C(15)   | 120.8(3) |
| C(22)-C(21)-N(6)    | 111.0(3) |
| C(28)-C(23)-C(24)   | 115.9(3) |
| C(28)-C(23)-C(23)#2 | 122.6(4) |
| C(24)-C(23)-C(23)#2 | 121.5(4) |
| C(25)-C(24)-C(23)   | 120.8(3) |
| N(5)-C(25)-C(24)    | 121.5(3) |
| N(5)-C(27)-C(28)    | 120.8(3) |
| C(27)-C(28)-C(23)   | 121.2(3) |
| C(30)-C(29)-N(5)    | 117.8(5) |
| F(2)-C(31)-F(3)     | 108.6(3) |
| F(2)-C(31)-F(1)     | 108.3(3) |
| F(3)-C(31)-F(1)     | 107.8(3) |
| F(2)-C(31)-S(1)     | 110.3(3) |
| F(3)-C(31)-S(1)     | 111.4(2) |
| F(1)-C(31)-S(1)     | 110.5(3) |
| F(5)-C(32)-F(6)     | 109.2(4) |
| F(5)-C(32)-F(4)     | 107.2(4) |
| F(6)-C(32)-F(4)     | 106.7(4) |
| F(5)-C(32)-S(2)     | 112.4(3) |
| F(6)-C(32)-S(2)     | 110.2(3) |
| F(4)-C(32)-S(2)     | 110.9(3) |
| F(7)-C(33)-F(8)     | 108.4(3) |
| F(7)-C(33)-F(9)     | 108.3(3) |
| F(8)-C(33)-F(9)     | 108.3(3) |
| F(7)-C(33)-S(3)     | 111.4(3) |
| F(8)-C(33)-S(3)     | 110.7(3) |
| F(9)-C(33)-S(3)     | 109.6(3) |
| F(10)-C(34)-F(11)   | 108.0(3) |
| F(10)-C(34)-F(12)   | 107.6(4) |
| F(11)-C(34)-F(12)   | 108.1(4) |
| F(10)-C(34)-S(4)    | 110.9(3) |
| F(11)-C(34)-S(4)    | 111.7(3) |
| F(12)-C(34)-S(4)    | 110.4(3) |

---

Symmetry transformations used to generate equivalent atoms:

#1 -x+1,-y+1,-z+1 #2 -x,-y,-z+1
